# Supplementary material for: Low Genetic Quality Alters Key Dimensions of the Mutational Spectrum
Source: PLoS Biol. 2016 Mar 25;14(3):e1002419. doi: 10.1371/journal.pbio.1002419 (PMC4807879; doi:10.1371/journal.pbio.1002419)
Supplement: S1 Data — (XLSX) [file pbio.1002419.s001.xlsx]

## Sheet: Figs 1, 3, power, coverage
Sample	MA_lines	Genotype	Genetic_quality	Mass	Callable_sites	Mean_coverage	Substitutions	Indels	Gene_conversions	TE_insertions	Substitution_indel_power	Gene_conversion_power
1	4	wt	unloaded	1.07002	16763686	19.2	15	0	1	3	0.762722	0.578697
2	4	wt	unloaded	1.07002	17234939	27.1	13	0	1	3	1.11689	0.621802
3	4	Dr1	loaded	0.965614	34842691	19.5	26	2	1	0	1.61618	1.36738
4	4	Ki1	loaded	0.948274	33555872	16.1	13	1	0	5	1.18077	1.29476
5	4	Gl1	loaded	0.947946	34134664	17.1	21	2	0	7	1.32903	1.32541
6	4	Bsb1 sensLy-1	loaded	0.929347	35108283	19.5	21	0	0	6	1.64707	1.38236
7	4	Ki1 kD	loaded	0.931896	33686975	16.7	22	1	1	3	1.27918	1.31211
8	4	Gl1 H2	loaded	1.03507	25691314	11.1	10	0	0	1	0.522042	1.03468
9	4	wt	unloaded	1.07002	34668691	19.3	20	1	6	5	1.58373	1.3569
10	4	wt	unloaded	1.07002	31379614	14.4	11	0	6	6	0.94392	1.20933
11	4	Dr1	loaded	0.965614	30662300	13.9	7	0	0	2	0.873061	1.18945
12	4	Ki1	loaded	0.948274	31567698	14.6	12	0	0	2	0.979494	1.21783
13	4	Gl1	loaded	0.947946	30536957	13.5	13	0	0	4	0.807921	1.17397
14	4	Bsb1 sensLy-1	loaded	0.929347	29707560	13.3	12	1	0	3	0.800336	1.15983
15	4	Ki1 kD	loaded	0.931896	32490120	15.3	21	0	0	4	1.07239	1.25245
16	4	Gl1 H2	loaded	1.03507	24163681	11.4	14	0	1	0	0.527233	0.934429
17	2	wt	unloaded	1.07002	33654247	24	26	2	0	3	1.39141	0.769258
18	2	Bsb1 sensLy-1	loaded	0.929347	35659523	39.2	29	2	1	12	1.55968	0.810179
19	2	wt	unloaded	1.07002	31325988	19.2	21	1	3	3	1.24676	0.748135
20	2	Dr1	loaded	0.965614	35415037	33.3	23	1	1	9	1.53476	0.796216
21	2	wt	unloaded	1.07002	33171419	25.6	21	0	0	3	1.38483	0.768701
22	2	Ki1 kD	loaded	0.931896	35795779	36.6	14	4	1	7	1.57288	0.80708
23	2	wt	unloaded	1.07002	30261120	16.7	23	0	1	4	1.16534	0.738244
24	2	Gl1 H2	loaded	1.03507	36019006	44.7	21	2	0	11	1.607	0.829533
25	2	wt	unloaded	1.07002	35910038	37.8	19	0	1	7	1.58781	0.810118
26	2	Ki1	loaded	0.948274	31422297	18.9	19	3	0	3	1.24315	0.747186
27	2	wt	unloaded	1.07002	34852640	28.9	14	0	1	6	1.49131	0.78845
28	2	Ki1	loaded	0.948274	34710680	30.1	22	2	3	3	1.48693	0.790382
29	2	wt	unloaded	1.07002	35327513	38	14	0	0	5	1.54462	0.80916
30	2	Gl1 H2	loaded	1.03507	35368200	34.9	16	4	2	19	1.54369	0.80657
31	2	wt	unloaded	1.07002	33521562	33.8	16	0	0	10	1.4373	0.795681
32	2	Ki1 kD	loaded	0.931896	35697787	34.8	24	6	0	2	1.56692	0.802524
33	2	wt	unloaded	1.07002	34928742	28.1	24	2	0	11	1.49746	0.7841
34	2	Dr1	loaded	0.965614	34144053	25.1	23	0	0	4	1.43938	0.774305
35	2	wt	unloaded	1.07002	35862909	42.4	28	6	1	9	1.58998	0.82326
36	2	Bsb1 sensLy-1	loaded	0.929347	26119449	14.1	10	0	0	1	0.97771	0.707227
37	4	Gl1	loaded	0.947946	36054653	49.9	63	3	3	20	3.13701	1.56865
38	4	wt	unloaded	1.07002	36047265	50.8	48	3	1	20	3.13798	1.57103

## Sheet: Fig 2A
Substitution	Unloaded_observed	Unloaded_expected	Loaded_observed	Loaded_expected
A to C	21	56.91	30	84.25
C to G	31	45.09	38	65.09
A to T	37	56.91	69	84.25
C to A	46	45.09	75	65.09
A to G	40	56.91	63	84.25
C to T	131	45.09	173	65.09

## Sheet: Fig 2B
Context	Observed_substitutions	Total_detection_power
AAA	30	1.60367e+08
CAA	14	1.03422e+08
GAA	5	8.66249e+07
TAA	17	9.20227e+07
AAT	21	1.23607e+08
CAT	15	8.27155e+07
GAT	14	6.87928e+07
TAT	10	9.05052e+07
AAC	18	7.6928e+07
CAC	12	6.4379e+07
GAC	16	4.67114e+07
TAC	15	4.78078e+07
AAG	23	8.01873e+07
CAG	17	7.44468e+07
GAG	14	5.7787e+07
TAG	19	4.43922e+07
ACA	27	8.55382e+07
CCA	39	8.18624e+07
GCA	29	8.64821e+07
TCA	43	7.29966e+07
ACT	30	6.81948e+07
CCT	20	5.23923e+07
GCT	34	7.16778e+07
TCT	39	6.55613e+07
ACC	21	4.93706e+07
CCC	29	4.81448e+07
GCC	35	6.61762e+07
TCC	45	6.47413e+07
ACG	24	4.44669e+07
CCG	16	4.63767e+07
GCG	30	5.15099e+07
TCG	33	6.01725e+07

## Sheet: Fig 4
Distance	Substitution_obs_rel_exp	Substitution_lower_SE	Substitution_upper_SE	Indel_obs_rel_exp	Indel_lower_SE	Indel_upper_SE
1	0.979966	0.965887	0.994045	0.856983	0.797739	0.916226
2	0.981599	0.967712	0.995485	0.863117	0.804648	0.921586
3	0.982443	0.968654	0.996231	0.864645	0.807457	0.921834
4	0.984708	0.971051	0.998365	0.871353	0.812934	0.929772
5	0.984618	0.971033	0.998203	0.87411	0.814737	0.933482
6	0.984214	0.970701	0.997727	0.878497	0.820349	0.936646
7	0.985466	0.971924	0.999009	0.885309	0.828233	0.942384
8	0.985446	0.97209	0.998802	0.887172	0.831284	0.94306
9	0.985425	0.972085	0.998766	0.891733	0.834635	0.948832
10	0.985731	0.972432	0.99903	0.891965	0.835048	0.948882
11	0.987532	0.974407	1.00066	0.889652	0.832395	0.946909
12	0.988614	0.975488	1.00174	0.890538	0.834069	0.947007
13	0.988467	0.975474	1.00146	0.893601	0.836417	0.950786
14	0.987322	0.974415	1.00023	0.895374	0.839356	0.951392
15	0.987879	0.975008	1.00075	0.90086	0.845589	0.956131
16	0.988413	0.975579	1.00125	0.903846	0.848707	0.958984
17	0.988505	0.975767	1.00124	0.899592	0.845429	0.953756
18	0.989034	0.976363	1.0017	0.898081	0.843911	0.95225
19	0.989498	0.976826	1.00217	0.899539	0.844819	0.954259
20	0.987852	0.97525	1.00045	0.904047	0.849447	0.958646
21	0.988469	0.97592	1.00102	0.906254	0.852176	0.960332
22	0.988971	0.976526	1.00142	0.903882	0.849188	0.958577
23	0.989764	0.977403	1.00212	0.906157	0.851558	0.960757
24	0.990138	0.977758	1.00252	0.901664	0.847695	0.955632
25	0.990682	0.978357	1.00301	0.905253	0.850492	0.960014
26	0.991031	0.978741	1.00332	0.907349	0.853491	0.961207
27	0.990378	0.978124	1.00263	0.908277	0.855038	0.961517
28	0.99001	0.977755	1.00227	0.916033	0.861913	0.970154
29	0.990402	0.978213	1.00259	0.913576	0.859794	0.967358
30	0.991279	0.979155	1.0034	0.913042	0.860086	0.965999
31	0.992638	0.980423	1.00485	0.913188	0.860433	0.965944
32	0.994736	0.982546	1.00693	0.913837	0.862181	0.965493
33	0.994742	0.982608	1.00688	0.913346	0.861613	0.965079
34	0.993554	0.981398	1.00571	0.908346	0.857963	0.958729
35	0.994456	0.982378	1.00653	0.908687	0.85906	0.958313
36	0.996331	0.984297	1.00836	0.913788	0.863446	0.96413
37	0.995689	0.983597	1.00778	0.915234	0.865421	0.965047
38	0.995923	0.983897	1.00795	0.914592	0.863992	0.965191
39	0.99627	0.984295	1.00824	0.920152	0.868109	0.972194
40	0.995787	0.983827	1.00775	0.924171	0.872624	0.975717
41	0.994573	0.982664	1.00648	0.923478	0.87268	0.974277
42	0.996649	0.984735	1.00856	0.931871	0.881163	0.982579
43	0.997445	0.985491	1.0094	0.928373	0.878502	0.978244
44	0.99723	0.985297	1.00916	0.932263	0.88308	0.981445
45	0.996214	0.984345	1.00808	0.940337	0.89141	0.989264
46	0.996686	0.984873	1.0085	0.944121	0.89534	0.992902
47	0.996947	0.985148	1.00875	0.944794	0.89558	0.994009
48	0.996701	0.984953	1.00845	0.945859	0.896227	0.995491
49	0.994563	0.982848	1.00628	0.948643	0.899029	0.998256
50	0.999146	0.98743	1.01086	0.945483	0.895256	0.99571
51	0.999619	0.988033	1.0112	0.947156	0.896934	0.997379
52	1.00038	0.988838	1.01193	0.948358	0.898937	0.99778
53	1.0009	0.989349	1.01246	0.943627	0.894241	0.993013
54	0.999958	0.988434	1.01148	0.946556	0.897044	0.996068
55	0.999216	0.98773	1.0107	0.946078	0.897593	0.994562
56	0.998829	0.987411	1.01025	0.94424	0.897311	0.991169
57	0.998635	0.987224	1.01005	0.941947	0.895192	0.988703
58	0.996918	0.985583	1.00825	0.938432	0.890666	0.986199
59	0.996437	0.985053	1.00782	0.93785	0.88934	0.986361
60	0.995809	0.984471	1.00715	0.937716	0.889788	0.985643
61	0.9952	0.983941	1.00646	0.941648	0.894563	0.988733
62	0.993823	0.982564	1.00508	0.940365	0.893204	0.987527
63	0.993741	0.982469	1.00501	0.943622	0.896022	0.991223
64	0.994212	0.983019	1.00541	0.942016	0.894706	0.989325
65	0.99584	0.984714	1.00697	0.946997	0.899909	0.994085
66	0.994882	0.983797	1.00597	0.947197	0.900041	0.994352
67	0.994779	0.983769	1.00579	0.947982	0.900284	0.995681
68	0.994395	0.983449	1.00534	0.949922	0.901488	0.998357
69	0.993708	0.982824	1.00459	0.955716	0.907429	1.004
70	0.993381	0.982496	1.00427	0.954897	0.907318	1.00248
71	0.994186	0.983353	1.00502	0.95239	0.904383	1.0004
72	0.993967	0.983133	1.0048	0.95115	0.902681	0.99962
73	0.992901	0.982034	1.00377	0.950351	0.903162	0.997541
74	0.992791	0.981943	1.00364	0.948301	0.902002	0.994601
75	0.992788	0.981949	1.00363	0.953758	0.907284	1.00023
76	0.992222	0.981381	1.00306	0.952122	0.906243	0.998001
77	0.992283	0.981486	1.00308	0.9519	0.906832	0.996967
78	0.991738	0.980973	1.0025	0.956799	0.91088	1.00272
79	0.991497	0.980712	1.00228	0.955824	0.910892	1.00076
80	0.991662	0.980823	1.0025	0.957895	0.913192	1.0026
81	0.992977	0.98216	1.00379	0.960335	0.914033	1.00664
82	0.991731	0.980962	1.0025	0.962307	0.915509	1.0091
83	0.991055	0.980312	1.0018	0.96364	0.916623	1.01066
84	0.990711	0.979956	1.00147	0.967401	0.920143	1.01466
85	0.991632	0.980839	1.00242	0.973095	0.92609	1.0201
86	0.991218	0.980435	1.002	0.969913	0.923842	1.01598
87	0.991928	0.981251	1.0026	0.971302	0.925243	1.01736
88	0.993404	0.98274	1.00407	0.974018	0.928181	1.01986
89	0.992898	0.982225	1.00357	0.971954	0.925726	1.01818
90	0.991268	0.980506	1.00203	0.964479	0.918762	1.0102
91	0.991717	0.980998	1.00244	0.963338	0.917477	1.0092
92	0.992743	0.982052	1.00343	0.965186	0.919103	1.01127
93	0.991447	0.98076	1.00213	0.962299	0.916025	1.00857
94	0.989652	0.978948	1.00036	0.968296	0.9222	1.01439
95	0.990711	0.980085	1.00134	0.967974	0.920831	1.01512
96	0.99097	0.980366	1.00157	0.965983	0.919065	1.0129
97	0.990559	0.979929	1.00119	0.962333	0.915236	1.00943
98	0.991	0.98034	1.00166	0.962065	0.915287	1.00884
99	0.992078	0.981429	1.00273	0.960435	0.914812	1.00606
100	0.99173	0.981082	1.00238	0.959548	0.913815	1.00528
101	0.989911	0.979298	1.00052	0.966336	0.920313	1.01236
102	0.990707	0.980237	1.00118	0.966284	0.920095	1.01247
103	0.988985	0.978503	0.999467	0.968087	0.921451	1.01472
104	0.987145	0.976717	0.997573	0.970084	0.924205	1.01596
105	0.987477	0.976951	0.998002	0.968032	0.922896	1.01317
106	0.986921	0.976365	0.997477	0.966973	0.922728	1.01122
107	0.988133	0.977507	0.998759	0.969875	0.924968	1.01478
108	0.988426	0.977772	0.999079	0.969274	0.92371	1.01484
109	0.989372	0.978664	1.00008	0.96847	0.922392	1.01455
110	0.990636	0.980017	1.00126	0.970802	0.925753	1.01585
111	0.991107	0.980466	1.00175	0.971931	0.926965	1.0169
112	0.991842	0.981188	1.0025	0.969232	0.9242	1.01426
113	0.991936	0.981287	1.00258	0.976044	0.930117	1.02197
114	0.991378	0.980719	1.00204	0.9776	0.931162	1.02404
115	0.989323	0.978705	0.999941	0.975288	0.929189	1.02139
116	0.98809	0.977523	0.998657	0.970635	0.923427	1.01784
117	0.988274	0.97767	0.998878	0.970177	0.922295	1.01806
118	0.988119	0.977527	0.998711	0.969394	0.923825	1.01496
119	0.98757	0.976986	0.998154	0.972509	0.926118	1.0189
120	0.986366	0.975757	0.996975	0.970966	0.924591	1.01734
121	0.986152	0.97562	0.996683	0.973733	0.927033	1.02043
122	0.987335	0.976687	0.997983	0.973104	0.92612	1.02009
123	0.987168	0.976523	0.997813	0.977036	0.930965	1.02311
124	0.987556	0.977006	0.998106	0.980847	0.935803	1.02589
125	0.986763	0.976271	0.997255	0.984635	0.939084	1.03019
126	0.986679	0.976289	0.99707	0.986665	0.941179	1.03215
127	0.986247	0.97589	0.996605	0.986841	0.940862	1.03282
128	0.986154	0.975711	0.996597	0.986138	0.940241	1.03203
129	0.98643	0.976146	0.996714	0.98269	0.936842	1.02854
130	0.986382	0.976114	0.99665	0.979644	0.934636	1.02465
131	0.985807	0.975524	0.99609	0.976066	0.930933	1.0212
132	0.984714	0.974395	0.995033	0.97393	0.928935	1.01892
133	0.98597	0.975723	0.996216	0.975204	0.931321	1.01909
134	0.986083	0.975899	0.996266	0.970475	0.927396	1.01355
135	0.984894	0.974719	0.995068	0.972423	0.930878	1.01397
136	0.984303	0.974181	0.994424	0.971374	0.929303	1.01344
137	0.984099	0.973909	0.994288	0.974559	0.931702	1.01742
138	0.982209	0.972026	0.992392	0.969229	0.926952	1.01151
139	0.981216	0.970943	0.991488	0.96429	0.923624	1.00496
140	0.98249	0.972246	0.992734	0.968669	0.927738	1.0096
141	0.982944	0.972636	0.993252	0.972333	0.932189	1.01248
142	0.982097	0.97179	0.992404	0.973826	0.934101	1.01355
143	0.982428	0.972117	0.992739	0.978173	0.939598	1.01675
144	0.983347	0.97299	0.993704	0.977043	0.937935	1.01615
145	0.984195	0.973869	0.994522	0.976752	0.935985	1.01752
146	0.983291	0.972899	0.993682	0.969839	0.928948	1.01073
147	0.982879	0.972458	0.993301	0.970496	0.92961	1.01138
148	0.983053	0.972637	0.993469	0.979311	0.937793	1.02083
149	0.983624	0.973194	0.994054	0.986598	0.944842	1.02835
150	0.983348	0.972873	0.993822	0.988177	0.946034	1.03032
151	0.983487	0.97296	0.994013	0.988151	0.944535	1.03177
152	0.982507	0.971955	0.993058	0.9838	0.93884	1.02876
153	0.982728	0.972142	0.993315	0.987231	0.942518	1.03194
154	0.984086	0.973493	0.99468	0.984705	0.939305	1.0301
155	0.984703	0.974064	0.995341	0.989344	0.943783	1.03491
156	0.986009	0.975409	0.996609	0.993392	0.948249	1.03853
157	0.985626	0.975	0.996252	0.992587	0.946308	1.03887
158	0.985017	0.974459	0.995576	0.990665	0.945732	1.0356
159	0.985713	0.975139	0.996287	0.997992	0.952206	1.04378
160	0.98656	0.976013	0.997107	1.00005	0.954088	1.04602
161	0.986387	0.975863	0.99691	0.998194	0.950961	1.04543
162	0.985542	0.975015	0.99607	0.996981	0.949819	1.04414
163	0.984859	0.974283	0.995434	0.997631	0.950729	1.04453
164	0.984542	0.973954	0.995129	0.998961	0.951705	1.04622
165	0.984307	0.973708	0.994906	0.996324	0.948225	1.04442
166	0.98705	0.976467	0.997634	0.999506	0.952115	1.0469
167	0.986474	0.975813	0.997136	1.00091	0.953743	1.04809
168	0.986491	0.975825	0.997158	0.9992	0.95143	1.04697
169	0.984941	0.974285	0.995597	1.00107	0.953099	1.04905
170	0.985005	0.974296	0.995714	0.997339	0.948807	1.04587
171	0.986714	0.97601	0.997417	0.996331	0.946419	1.04624
172	0.987847	0.977153	0.998541	0.99789	0.948779	1.047
173	0.987271	0.976586	0.997957	1.00165	0.95216	1.05114
174	0.986707	0.976002	0.997412	0.995896	0.945798	1.04599
175	0.986948	0.976328	0.997567	0.999446	0.947981	1.05091
176	0.986347	0.97576	0.996934	0.998375	0.948357	1.04839
177	0.986021	0.975416	0.996626	0.997346	0.948218	1.04647
178	0.986657	0.975998	0.997317	0.998073	0.94804	1.04811
179	0.986796	0.976212	0.99738	0.996432	0.947321	1.04554
180	0.986714	0.975953	0.997474	1.00039	0.949923	1.05087
181	0.987375	0.976628	0.998122	0.99967	0.948125	1.05122
182	0.986968	0.976222	0.997715	1.00249	0.950239	1.05474
183	0.988894	0.978148	0.99964	1.00891	0.955826	1.06199
184	0.98862	0.977854	0.999385	1.00736	0.954533	1.06018
185	0.987738	0.976946	0.998531	1.01114	0.959016	1.06326
186	0.98765	0.976869	0.998431	1.00722	0.956077	1.05837
187	0.988381	0.97759	0.999172	1.01019	0.958402	1.06198
188	0.989071	0.978294	0.999848	1.00954	0.957008	1.06208
189	0.989492	0.978774	1.00021	1.0079	0.954679	1.06112
190	0.990124	0.979529	1.00072	1.00688	0.952701	1.06105
191	0.988805	0.978232	0.999377	1.00459	0.951429	1.05776
192	0.989664	0.979042	1.00029	1.00579	0.952726	1.05885
193	0.990447	0.979762	1.00113	1.00578	0.95337	1.05818
194	0.989903	0.979128	1.00068	1.00236	0.950083	1.05464
195	0.989173	0.978387	0.999959	1.00277	0.950919	1.05462
196	0.988844	0.97805	0.999637	1.00639	0.955735	1.05705
197	0.989834	0.97912	1.00055	1.01337	0.962531	1.06421
198	0.989824	0.979053	1.0006	1.0098	0.958797	1.06081
199	0.989809	0.979036	1.00058	1.00804	0.958002	1.05807
200	0.988473	0.977631	0.999315	1.00452	0.953298	1.05574
201	0.988567	0.977744	0.99939	1.0088	0.958049	1.05954
202	0.989201	0.978218	1.00018	1.01076	0.960999	1.06051
203	0.990803	0.979867	1.00174	1.01259	0.962863	1.06231
204	0.990235	0.979299	1.00117	1.01261	0.96334	1.06188
205	0.990208	0.97927	1.00115	1.01383	0.965239	1.06242
206	0.989533	0.97853	1.00054	1.01264	0.963672	1.0616
207	0.987963	0.977011	0.998915	1.00832	0.959944	1.05669
208	0.988339	0.977413	0.999264	1.00837	0.961077	1.05566
209	0.987991	0.977025	0.998958	1.00912	0.961512	1.05673
210	0.987814	0.976868	0.998761	1.00507	0.958113	1.05202
211	0.987279	0.976327	0.998231	1.01013	0.962046	1.05822
212	0.987667	0.976786	0.998548	1.01444	0.967412	1.06148
213	0.988487	0.977594	0.99938	1.01252	0.966028	1.05901
214	0.988781	0.977931	0.999631	1.01308	0.966531	1.05963
215	0.989873	0.979029	1.00072	1.01058	0.963546	1.05762
216	0.989819	0.978961	1.00068	1.01119	0.966439	1.05594
217	0.988713	0.977727	0.999699	1.0146	0.968548	1.06066
218	0.990095	0.979054	1.00114	1.0107	0.965463	1.05594
219	0.990922	0.979868	1.00198	1.00909	0.963925	1.05426
220	0.992973	0.981954	1.00399	1.00708	0.961921	1.05223
221	0.993966	0.982876	1.00506	1.01034	0.964717	1.05596
222	0.993612	0.982546	1.00468	1.01107	0.966412	1.05574
223	0.992369	0.981303	1.00344	1.00943	0.963941	1.05492
224	0.993358	0.982224	1.00449	1.00626	0.959343	1.05318
225	0.993845	0.982756	1.00493	1.00852	0.96239	1.05466
226	0.992903	0.981907	1.0039	1.00766	0.961661	1.05366
227	0.994378	0.983315	1.00544	1.00634	0.959958	1.05272
228	0.993796	0.982731	1.00486	1.00479	0.958888	1.0507
229	0.994449	0.983389	1.00551	1.00847	0.961796	1.05515
230	0.994967	0.983975	1.00596	1.00999	0.963402	1.05657
231	0.994039	0.98307	1.00501	1.00652	0.960219	1.05282
232	0.993849	0.982912	1.00479	1.01002	0.964241	1.05579
233	0.994293	0.98343	1.00516	1.00917	0.963306	1.05504
234	0.991387	0.980503	1.00227	1.00551	0.959482	1.05153
235	0.991025	0.980153	1.0019	1.01149	0.965859	1.05712
236	0.991711	0.980828	1.00259	1.01287	0.966525	1.05921
237	0.992867	0.981952	1.00378	1.01548	0.969994	1.06097
238	0.993132	0.982253	1.00401	1.01448	0.968283	1.06068
239	0.992296	0.981403	1.00319	1.01396	0.968071	1.05984
240	0.992648	0.981627	1.00367	1.01737	0.971324	1.06342
241	0.992412	0.981351	1.00347	1.02217	0.975096	1.06924
242	0.993017	0.982039	1.004	1.02205	0.974079	1.07001
243	0.992656	0.981679	1.00363	1.02264	0.975825	1.06945
244	0.992051	0.981123	1.00298	1.02024	0.974877	1.06559
245	0.992889	0.981969	1.00381	1.02125	0.97473	1.06777
246	0.993461	0.982616	1.00431	1.02157	0.974591	1.06856
247	0.993865	0.98301	1.00472	1.01677	0.970393	1.06315
248	0.994161	0.983309	1.00501	1.00887	0.963323	1.05441
249	0.995661	0.984831	1.00649	1.00712	0.963419	1.05082
250	0.995977	0.985172	1.00678	1.00633	0.962099	1.05056
251	0.996967	0.986201	1.00773	1.00254	0.958645	1.04643
252	0.996856	0.986005	1.00771	1.00129	0.955737	1.04684
253	0.996922	0.986171	1.00767	1.00095	0.953764	1.04814
254	0.995399	0.984575	1.00622	1.00116	0.953551	1.04877
255	0.996089	0.985291	1.00689	1.00268	0.954068	1.05128
256	0.995617	0.984817	1.00642	1.00298	0.953548	1.05241
257	0.996344	0.985614	1.00707	0.999454	0.951028	1.04788
258	0.99714	0.98641	1.00787	1.00379	0.955106	1.05247
259	0.998281	0.9875	1.00906	1.00818	0.959704	1.05665
260	0.99831	0.987487	1.00913	1.01352	0.966068	1.06098
261	0.997815	0.986967	1.00866	1.01465	0.967385	1.06192
262	0.997893	0.987045	1.00874	1.00811	0.960357	1.05586
263	0.996405	0.985504	1.00731	1.00744	0.960054	1.05482
264	0.99691	0.985953	1.00787	1.00706	0.95827	1.05585
265	0.996073	0.985078	1.00707	1.00555	0.956758	1.05434
266	0.995861	0.984872	1.00685	1.00661	0.958356	1.05486
267	0.996304	0.985259	1.00735	1.00763	0.956905	1.05835
268	0.996722	0.985645	1.0078	1.0041	0.953558	1.05465
269	0.996687	0.985618	1.00776	1.00508	0.954359	1.0558
270	0.996168	0.985121	1.00721	1.00829	0.956027	1.06056
271	0.996319	0.985223	1.00741	1.00735	0.953754	1.06095
272	0.996407	0.985382	1.00743	1.00899	0.955881	1.06211
273	0.996459	0.985357	1.00756	1.008	0.955758	1.06024
274	0.996909	0.985796	1.00802	1.00883	0.955441	1.06221
275	0.995459	0.984312	1.00661	1.00971	0.956952	1.06248
276	0.996031	0.984818	1.00724	1.00853	0.955749	1.06132
277	0.99744	0.986163	1.00872	1.00715	0.953865	1.06043
278	0.996197	0.984935	1.00746	1.00585	0.952148	1.05954
279	0.995472	0.984111	1.00683	1.00608	0.953556	1.05859
280	0.995341	0.984035	1.00665	1.00123	0.948908	1.05354
281	0.992889	0.981622	1.00416	1.00224	0.949341	1.05514
282	0.993433	0.98218	1.00469	1.00374	0.950817	1.05666
283	0.993087	0.981746	1.00443	1.00204	0.948148	1.05593
284	0.99238	0.980958	1.0038	1.00336	0.950724	1.05599
285	0.992854	0.981495	1.00421	1.00081	0.949525	1.0521
286	0.991974	0.980626	1.00332	0.999501	0.94741	1.05159
287	0.991764	0.980477	1.00305	0.9963	0.945816	1.04678
288	0.991522	0.980219	1.00282	0.995021	0.944927	1.04511
289	0.990858	0.979604	1.00211	0.995702	0.946657	1.04475
290	0.991356	0.980078	1.00263	1.00015	0.950772	1.04953
291	0.990912	0.979724	1.0021	1.00126	0.951715	1.0508
292	0.991628	0.980485	1.00277	0.999506	0.950709	1.0483
293	0.990996	0.979746	1.00225	0.99952	0.950164	1.04888
294	0.990638	0.979391	1.00189	0.997164	0.94734	1.04699
295	0.991964	0.980648	1.00328	0.999349	0.948199	1.0505
296	0.992124	0.980862	1.00339	0.996842	0.945932	1.04775
297	0.991398	0.980104	1.00269	0.998307	0.947521	1.04909
298	0.990766	0.979512	1.00202	1.00136	0.950669	1.05204
299	0.990612	0.979342	1.00188	1.0061	0.955936	1.05626
300	0.989132	0.977842	1.00042	1.00771	0.958057	1.05735
301	0.988966	0.977641	1.00029	1.00605	0.955195	1.0569
302	0.988464	0.977116	0.999812	1.00921	0.95783	1.06058
303	0.987591	0.976253	0.99893	1.00841	0.957722	1.0591
304	0.987057	0.975685	0.998428	1.01113	0.960752	1.06152
305	0.986349	0.975117	0.997582	1.00578	0.956748	1.05482
306	0.985244	0.974067	0.996421	1.00451	0.955597	1.05343
307	0.98561	0.974487	0.996732	1.00456	0.955384	1.05373
308	0.986385	0.975157	0.997613	1.00599	0.95653	1.05545
309	0.98856	0.977394	0.999725	0.999832	0.950214	1.04945
310	0.987767	0.97666	0.998874	0.997429	0.946143	1.04872
311	0.988553	0.977434	0.999672	0.992057	0.938992	1.04512
312	0.988592	0.977467	0.999718	0.993273	0.939731	1.04682
313	0.987287	0.976252	0.998323	0.997813	0.94453	1.0511
314	0.986737	0.975676	0.997798	0.992761	0.93867	1.04685
315	0.986598	0.97556	0.997635	0.994346	0.941253	1.04744
316	0.987188	0.976227	0.998148	0.994692	0.941498	1.04789
317	0.985636	0.974663	0.996609	0.99048	0.938282	1.04268
318	0.98558	0.974647	0.996512	0.989433	0.938081	1.04078
319	0.984758	0.973833	0.995683	0.98983	0.937751	1.04191
320	0.983612	0.972731	0.994493	0.992843	0.941161	1.04453
321	0.983078	0.972197	0.993958	0.992732	0.942122	1.04334
322	0.982048	0.971161	0.992934	0.995798	0.945222	1.04637
323	0.982311	0.971433	0.99319	0.994982	0.943486	1.04648
324	0.982756	0.971762	0.99375	0.995164	0.943045	1.04728
325	0.982995	0.971924	0.994067	0.993412	0.942409	1.04442
326	0.983397	0.972344	0.994449	0.993783	0.94191	1.04566
327	0.982785	0.971796	0.993775	1.00041	0.948586	1.05224
328	0.982627	0.971604	0.99365	0.998557	0.947097	1.05002
329	0.983118	0.972054	0.994183	1.00213	0.949801	1.05447
330	0.984743	0.973681	0.995805	1.00304	0.950031	1.05605
331	0.984567	0.973473	0.995661	1.00322	0.950677	1.05576
332	0.986683	0.975543	0.997823	1.00212	0.950155	1.05408
333	0.985684	0.974529	0.996839	1.00225	0.950478	1.05402
334	0.985189	0.974042	0.996336	1.00379	0.953501	1.05408
335	0.985264	0.974164	0.996363	1.00711	0.956251	1.05798
336	0.985863	0.974798	0.996928	1.0094	0.958529	1.06027
337	0.986508	0.975505	0.997511	1.0137	0.963867	1.06353
338	0.986913	0.97587	0.997955	1.01429	0.964954	1.06363
339	0.987213	0.976196	0.998229	1.01224	0.964019	1.06046
340	0.987915	0.97682	0.999011	1.01125	0.962967	1.05953
341	0.988111	0.976999	0.999223	1.00927	0.96197	1.05657
342	0.988305	0.977175	0.999434	1.00631	0.958715	1.05391
343	0.988369	0.977295	0.999444	1.01108	0.963493	1.05866
344	0.988851	0.977737	0.999965	1.00942	0.962024	1.05681
345	0.988708	0.977531	0.999885	1.01175	0.964878	1.05861
346	0.987164	0.976022	0.998305	1.01231	0.964917	1.05969
347	0.986218	0.974977	0.997458	1.0105	0.96447	1.05654
348	0.98739	0.976133	0.998646	1.01188	0.966378	1.05739
349	0.987943	0.976669	0.999216	1.00869	0.963401	1.05399
350	0.988021	0.976734	0.999309	1.01509	0.969403	1.06077
351	0.987087	0.975721	0.998453	1.0158	0.97172	1.05988
352	0.987382	0.976051	0.998713	1.01265	0.968759	1.05654
353	0.987641	0.97628	0.999001	1.01065	0.967626	1.05367
354	0.989087	0.977804	1.00037	1.00728	0.965266	1.0493
355	0.989018	0.977746	1.00029	1.00541	0.965161	1.04566
356	0.991702	0.980471	1.00293	1.0136	0.972465	1.05474
357	0.992047	0.980817	1.00328	1.01609	0.974958	1.05722
358	0.991821	0.980527	1.00312	1.01663	0.974718	1.05855
359	0.990692	0.979422	1.00196	1.01854	0.976994	1.06009
360	0.988867	0.97766	1.00007	1.02217	0.981189	1.06314
361	0.98764	0.976292	0.998988	1.0232	0.982611	1.06378
362	0.986911	0.975625	0.998197	1.0228	0.983078	1.06252
363	0.986979	0.975752	0.998206	1.02226	0.981286	1.06324
364	0.988439	0.977193	0.999685	1.02162	0.98098	1.06227
365	0.989178	0.977943	1.00041	1.02133	0.980699	1.06196
366	0.989005	0.977797	1.00021	1.02274	0.981936	1.06355
367	0.987398	0.976156	0.99864	1.02483	0.983259	1.06641
368	0.988158	0.976866	0.99945	1.02866	0.98637	1.07095
369	0.988787	0.977472	1.0001	1.03042	0.987412	1.07344
370	0.990223	0.978951	1.00149	1.03116	0.987726	1.0746
371	0.991101	0.97987	1.00233	1.02724	0.982457	1.07203
372	0.991651	0.980377	1.00292	1.02113	0.976118	1.06615
373	0.992493	0.981215	1.00377	1.02094	0.976678	1.0652
374	0.991685	0.980405	1.00297	1.01933	0.976553	1.0621
375	0.990444	0.979242	1.00165	1.01999	0.977481	1.06251
376	0.989056	0.977921	1.00019	1.02384	0.981957	1.06573
377	0.989478	0.978224	1.00073	1.02097	0.97755	1.06439
378	0.98903	0.97785	1.00021	1.01812	0.974378	1.06186
379	0.988968	0.977746	1.00019	1.01932	0.975076	1.06356
380	0.988583	0.977313	0.999854	1.01657	0.972398	1.06073
381	0.989116	0.977882	1.00035	1.01468	0.97194	1.05743
382	0.989226	0.977946	1.00051	1.01729	0.974861	1.05973
383	0.988638	0.977342	0.999935	1.02114	0.97776	1.06453
384	0.988406	0.977132	0.999679	1.01611	0.973083	1.05914
385	0.989708	0.97845	1.00097	1.01669	0.973128	1.06025
386	0.989479	0.978233	1.00072	1.00834	0.964922	1.05176
387	0.989475	0.978296	1.00065	1.01273	0.967455	1.058
388	0.989867	0.978682	1.00105	1.0098	0.965132	1.05446
389	0.988917	0.977822	1.00001	1.01437	0.970427	1.05831
390	0.988935	0.977838	1.00003	1.0141	0.96932	1.05889
391	0.98722	0.976141	0.998299	1.02191	0.977845	1.06597
392	0.98797	0.976879	0.999061	1.01925	0.975537	1.06296
393	0.989143	0.978034	1.00025	1.02241	0.978493	1.06633
394	0.988701	0.977653	0.999748	1.01868	0.975441	1.06193
395	0.988912	0.977909	0.999915	1.02206	0.978954	1.06517
396	0.989237	0.978289	1.00019	1.0217	0.978176	1.06523
397	0.988755	0.977844	0.999665	1.02505	0.981673	1.06842
398	0.989428	0.978553	1.0003	1.02324	0.97845	1.06804
399	0.988308	0.977381	0.999235	1.02453	0.978893	1.07016
400	0.987743	0.976954	0.998533	1.02063	0.975648	1.06561
401	0.98653	0.975799	0.997261	1.013	0.967036	1.05897
402	0.988355	0.977556	0.999154	1.01444	0.967738	1.06114
403	0.986627	0.97585	0.997404	1.0207	0.974201	1.06719
404	0.986573	0.975853	0.997293	1.02357	0.977426	1.06971
405	0.985586	0.974823	0.996348	1.02643	0.979324	1.07353
406	0.985624	0.974845	0.996403	1.0264	0.978824	1.07398
407	0.984041	0.973299	0.994782	1.01994	0.972724	1.06715
408	0.984767	0.974025	0.99551	1.01874	0.971232	1.06625
409	0.984113	0.973322	0.994904	1.0234	0.977259	1.06955
410	0.983292	0.972485	0.994099	1.02075	0.973718	1.06778
411	0.98295	0.97218	0.99372	1.02239	0.975333	1.06944
412	0.98413	0.97334	0.994921	1.02027	0.97261	1.06793
413	0.983292	0.972477	0.994108	1.02186	0.974121	1.06959
414	0.98358	0.972709	0.994451	1.01438	0.967094	1.06167
415	0.983567	0.972684	0.994451	1.01293	0.965167	1.06069
416	0.983633	0.972777	0.994489	1.01698	0.968831	1.06514
417	0.982151	0.97133	0.992973	1.01952	0.971058	1.06797
418	0.983743	0.972909	0.994577	1.01771	0.968632	1.06679
419	0.983568	0.972742	0.994393	1.02002	0.970413	1.06963
420	0.982679	0.971838	0.99352	1.01964	0.969045	1.07024
421	0.982188	0.971396	0.99298	1.02239	0.971687	1.07309
422	0.981518	0.970688	0.992348	1.02654	0.976395	1.07668
423	0.982518	0.971723	0.993312	1.02957	0.978841	1.0803
424	0.982181	0.971324	0.993038	1.0278	0.976959	1.07863
425	0.983379	0.972609	0.994149	1.03071	0.979668	1.08176
426	0.98356	0.972697	0.994423	1.02707	0.976645	1.07749
427	0.982832	0.972011	0.993653	1.02643	0.975245	1.07762
428	0.981279	0.970555	0.992004	1.02678	0.977048	1.07651
429	0.981866	0.971062	0.99267	1.02691	0.977171	1.07665
430	0.981048	0.970249	0.991847	1.02665	0.97706	1.07624
431	0.981606	0.970811	0.9924	1.0227	0.972068	1.07333
432	0.980909	0.970181	0.991637	1.02554	0.974862	1.07621
433	0.978957	0.96824	0.989674	1.02624	0.97485	1.07764
434	0.978364	0.967657	0.98907	1.02319	0.971355	1.07502
435	0.979914	0.969167	0.990662	1.03318	0.981347	1.08501
436	0.979086	0.968364	0.989809	1.03166	0.980231	1.08309
437	0.979132	0.968421	0.989843	1.03463	0.983988	1.08527
438	0.978609	0.967845	0.989374	1.0336	0.984194	1.08301
439	0.978686	0.967957	0.989415	1.03257	0.983591	1.08154
440	0.978072	0.967236	0.988909	1.03212	0.983642	1.08059
441	0.978174	0.967296	0.989053	1.0356	0.987346	1.08385
442	0.979298	0.968437	0.990159	1.0283	0.981357	1.07523
443	0.978458	0.967607	0.989308	1.02809	0.980738	1.07544
444	0.977195	0.966368	0.988022	1.0274	0.979649	1.07515
445	0.976413	0.965571	0.987256	1.02385	0.975751	1.07195
446	0.974906	0.964084	0.985728	1.02231	0.973987	1.07063
447	0.975288	0.964449	0.986126	1.02142	0.973704	1.06913
448	0.975021	0.964225	0.985817	1.02033	0.972527	1.06814
449	0.973138	0.962336	0.983939	1.02521	0.978675	1.07175
450	0.973517	0.962702	0.984333	1.02211	0.976352	1.06787
451	0.974865	0.96394	0.985789	1.02895	0.983183	1.07473
452	0.976163	0.965154	0.987172	1.03417	0.988053	1.08028
453	0.97541	0.964381	0.986438	1.03494	0.989581	1.08029
454	0.977075	0.966028	0.988123	1.03464	0.988257	1.08102
455	0.975506	0.964379	0.986633	1.03709	0.990396	1.08378
456	0.975385	0.964231	0.986539	1.03903	0.993265	1.08479
457	0.976557	0.965442	0.987673	1.04323	0.997487	1.08897
458	0.976999	0.965757	0.988241	1.04573	1.0007	1.09077
459	0.976776	0.965485	0.988068	1.04189	0.997365	1.08642
460	0.977375	0.966176	0.988573	1.03491	0.989578	1.08024
461	0.978403	0.967212	0.989595	1.03626	0.991502	1.08102
462	0.978088	0.9669	0.989276	1.0331	0.988962	1.07724
463	0.976787	0.965636	0.987938	1.03537	0.991622	1.07911
464	0.978115	0.966913	0.989318	1.03562	0.993219	1.07801
465	0.979131	0.967962	0.9903	1.04171	0.99863	1.08478
466	0.979188	0.968039	0.990336	1.04206	0.998417	1.08571
467	0.979943	0.96877	0.991116	1.03742	0.992917	1.08192
468	0.981471	0.970211	0.992731	1.03779	0.993023	1.08256
469	0.982103	0.970893	0.993312	1.04167	0.997574	1.08576
470	0.983755	0.972538	0.994971	1.03633	0.992474	1.0802
471	0.98435	0.973107	0.995592	1.03723	0.993494	1.08096
472	0.984394	0.973162	0.995625	1.03361	0.989282	1.07795
473	0.985201	0.974028	0.996375	1.03498	0.989912	1.08005
474	0.983973	0.972839	0.995106	1.03401	0.988952	1.07907
475	0.983691	0.972567	0.994814	1.03424	0.990556	1.07793
476	0.98264	0.971435	0.993845	1.03349	0.988198	1.07877
477	0.983199	0.971915	0.994483	1.03733	0.991296	1.08335
478	0.984859	0.973548	0.99617	1.03443	0.987512	1.08134
479	0.98608	0.974668	0.997492	1.03717	0.991022	1.08331
480	0.985835	0.97439	0.99728	1.03581	0.989728	1.08189
481	0.986392	0.974914	0.997869	1.03721	0.989448	1.08498
482	0.98618	0.974632	0.997729	1.04381	0.996414	1.0912
483	0.985974	0.974333	0.997615	1.04389	0.996203	1.09157
484	0.987492	0.975915	0.999068	1.04103	0.992526	1.08953
485	0.988087	0.976416	0.999757	1.04224	0.993346	1.09114
486	0.987391	0.975588	0.999194	1.03647	0.986928	1.08601
487	0.987706	0.975858	0.999553	1.03731	0.987727	1.08689
488	0.988714	0.97683	1.0006	1.03986	0.990058	1.08966
489	0.98913	0.977232	1.00103	1.03664	0.986824	1.08646
490	0.98863	0.976673	1.00059	1.03647	0.986067	1.08688
491	0.990164	0.97816	1.00217	1.03379	0.981794	1.08579
492	0.990237	0.978105	1.00237	1.0336	0.98056	1.08664
493	0.989874	0.977709	1.00204	1.0336	0.97857	1.08862
494	0.98995	0.977753	1.00215	1.04025	0.983868	1.09663
495	0.990481	0.978228	1.00273	1.04201	0.984415	1.09961
496	0.991078	0.978691	1.00346	1.04817	0.991215	1.10513
497	0.992857	0.980368	1.00535	1.05058	0.994416	1.10675
498	0.992309	0.979806	1.00481	1.05238	0.996216	1.10855
499	0.994679	0.98211	1.00725	1.04958	0.992591	1.10658
500	0.998255	0.985539	1.01097	1.05349	0.996627	1.11035

## Sheet: Fig S1
Ancestral_base	Derived_base	N_observed	Schrider_39	Schrider_33
A:T	C:G	51	20	26
C:G	G:C	69	21	32
A:T	T:A	106	39	49
C:G	A:T	121	39	50
A:T	G:C	103	39	58
C:G	T:A	304	60	299

## Sheet: Substitutions
Chromosome_arm	Location	Sample	Ancestral_sequence	Derived_sequence
2L	23023	3	A	T
2L	35133	32	G	A
2L	82528	36	C	G
2L	113089	17	G	A
2L	133437	5	C	A
2L	143494	7	G	T
2L	166580	10	C	T
2L	291902	21	C	T
2L	369008	13	C	T
2L	369319	6	T	C
2L	369617	13	T	A
2L	390295	3	T	C
2L	579422	15	A	C
2L	597189	29	G	A
2L	655322	34	C	A
2L	660396	28	T	A
2L	716541	6	G	T
2L	716595	35	C	T
2L	726456	34	C	T
2L	749596	5	C	G
2L	787585	19	G	T
2L	816748	33	C	A
2L	860602	30	A	C
2L	898285	22	G	A
2L	956403	17	G	T
2L	958609	37	C	T
2L	973587	37	C	T
2L	1010198	38	G	A
2L	1012928	28	T	C
2L	1029207	9	A	T
2L	1194121	37	T	G
2L	1244641	25	C	T
2L	1259811	6	G	A
2L	1318176	32	C	T
2L	1356334	37	T	C
2L	1389675	17	G	A
2L	1404429	37	T	C
2L	1414736	3	C	G
2L	1476595	8	G	A
2L	1495183	34	C	T
2L	1500543	23	T	C
2L	1668403	3	G	C
2L	1709599	15	G	T
2L	1762023	17	G	T
2L	1783965	27	G	C
2L	1836578	20	A	T
2L	1843966	27	G	T
2L	1937060	30	C	T
2L	2030456	26	A	C
2L	2063406	21	C	T
2L	2125245	7	C	A
2L	2357814	31	G	A
2L	2491338	23	C	T
2L	2672379	32	G	A
2L	2684297	31	T	G
2L	2710163	24	A	T
2L	2784374	35	C	T
2L	2905149	20	T	G
2L	2974178	20	T	A
2L	3046944	32	T	C
2L	3214990	3	G	A
2L	3267739	25	C	T
2L	3292971	21	G	T
2L	3298941	17	T	G
2L	3368097	29	C	A
2L	3394412	33	G	C
2L	3395337	8	A	T
2L	3472373	37	A	T
2L	3478988	30	T	A
2L	3480406	37	T	A
2L	3481032	37	T	A
2L	3486029	11	T	A
2L	3496006	7	C	A
2L	3519633	18	G	C
2L	3582508	37	G	A
2L	3768468	35	G	A
2L	3780197, 3780198, 3780199	32	G, G, A	A, A, C
2L	3797732	16	T	C
2L	3880247	33	A	T
2L	3929407	23	G	A
2L	4069248	30	C	A
2L	4125605	21	C	T
2L	4168111	19	A	G
2L	4225951	25	G	A
2L	4364603	14	T	A
2L	4386170	37	T	C
2L	4394583	9	A	C
2L	4403724	28	G	A
2L	4464821	34	C	G
2L	4560980	38	C	T
2L	4627482	37	G	T
2L	4675998	12	C	T
2L	4693615	26	G	C
2L	4697381	18	G	T
2L	4775947	5	G	C
2L	4836495	27	A	T
2L	4923817	32	C	A
2L	4961645	33	T	G
2L	5038453	10	C	T
2L	5148197	36	C	T
2L	5170429	26	C	T
2L	5280694	37	C	A
2L	5377976	21	G	C
2L	5401525	33	C	A
2L	5517484	14	G	A
2L	5524199	17	G	A
2L	5655590	22	G	T
2L	5674000	33	G	A
2L	5701190	36	T	A
2L	5727575	3	C	T
2L	5757071	32	C	A
2L	5769057	7	C	A
2L	5777460	6	C	A
2L	5910881	37	G	T
2L	5928564	25	G	A
2L	5935313	37	G	T
2L	6132196	15	G	A
2L	6218764	29	A	G
2L	6260885	37	G	T
2L	6352837	17	C	T
2L	6423403	37	G	A
2L	6460508	16	T	C
2L	6462256	33	A	T
2L	6513616	25	G	A
2L	6632609	29	C	T
2L	6816433	38	A	G
2L	6844733	26	C	T
2L	7000703	24	G	T
2L	7078159	24	A	T
2L	7152240	6	C	T
2L	7224895	14	A	G
2L	7234677	20	C	T
2L	7275102	37	A	T
2L	7276024	19	G	C
2L	7300719	25	C	T
2L	7354034	21	A	T
2L	7372088	7	C	T
2L	7409194	29	G	C
2L	7419613	35	T	A
2L	7486811	4	G	A
2L	7539461	20	A	C
2L	7727534	23	T	C
2L	7774876	14	C	T
2L	7854427	13	C	T
2L	7862926	31	T	A
2L	7875274	20	C	A
2L	7894554	21	G	A
2L	7924272	37	C	A
2L	8072549	37	G	A
2L	8110306	18	A	T
2L	8230361	38	T	G
2L	8328079, 8328113, 8328125	34	C, G, G	A, C, A
2L	8370748	9	C	A
2L	8387486	5	G	A
2L	8437322	38	C	A
2L	8567954	15	C	G
2L	8588436	22	G	T
2L	8645037	3	A	G
2L	8662368	34	G	C
2L	8693259	11	C	T
2L	8752039	18	A	G
2L	8780832	21	T	A
2L	8787950	14	C	T
2L	8907928	34	C	T
2L	8908372	35	A	G
2L	8946991	23	C	A
2L	8964365	38	G	A
2L	8998607	37	G	T
2L	9037387	30	A	C
2L	9050735	30	T	A
2L	9203858	18	A	G
2L	9250422	32	T	C
2L	9282474	16	G	A
2L	9398446	31	C	A
2L	9602036	12	G	A
2L	9659976	4	G	A
2L	9675762	22	T	A
2L	9678886	32	G	A
2L	9778955	27	C	A
2L	9889358	36	G	A
2L	9968471	38	T	C
2L	9988519	27	C	T
2L	10088601	23	C	T
2L	10123785	16	G	A
2L	10223581	7	G	T
2L	10248098	31	C	G
2L	10277574	28	G	A
2L	10419167	20	C	T
2L	10455343	13	C	T
2L	10493225	33	G	A
2L	10563087	5	A	T
2L	10659793	18	C	G
2L	10675780	38	G	A
2L	10683255	16	C	T
2L	10736648	31	C	A
2L	11068396	23	A	G
2L	11099130	38	G	T
2L	11112998	4	G	T
2L	11239524	33	C	A
2L	11261974	6	G	C
2L	11283910	15	G	T
2L	11284110	15	A	T
2L	11288235	33	A	T
2L	11289376	15	T	A
2L	11360825	10	A	T
2L	11362821	18	G	T
2L	11455248	38	C	A
2L	11529061	29	G	A
2L	11550280	37	A	T
2L	11571832	6	C	A
2L	11607511	18	C	T
2L	11610003	15	C	G
2L	11674181	9	C	T
2L	11705547	23	G	A
2L	11709325	37	A	G
2L	11844502	20	G	A
2L	11904886	7	G	A
2L	12027430	25	C	A
2L	12030146	6	G	A
2L	12040652	10	A	T
2L	12102831	26	T	C
2L	12179647	25	C	G
2L	12211585	18	G	T
2L	12314751	5	C	T
2L	12459490	38	T	A
2L	12606561	32	T	G
2L	12850311	36	C	T
2L	13007471	38	G	A
2L	13084581	24	G	A
2L	13089974	17	A	G
2L	13151886	37	G	A
2L	13171066	37	C	A
2L	13273844	28	C	T
2L	13274945	34	A	T
2L	13306783	25	C	A
2L	13387261	16	C	A
2L	13441646	31	C	T
2L	13499850	24	A	C
2L	13559231	35	C	A
2L	13689104	5	A	C
2L	13887605	35	T	G
2L	13897827	33	G	C
2L	13956509, 13956510	9	T, C	A, G
2L	14024720	12	G	T
2L	14230492	37	C	T
2L	14230592	20	G	A
2L	14275009	37	G	T
2L	14304938	26	C	A
2L	14314761	18	T	C
2L	14325889	30	A	G
2L	14342792	3	C	A
2L	14399969	38	C	T
2L	14464700	32	G	T
2L	14476157	26	A	G
2L	14482736	33	T	C
2L	14516398	15	C	A
2L	14598524	15	T	C
2L	14793236	35	C	T
2L	14842967	21	C	T
2L	14900408	35	C	T
2L	14925122	6	A	G
2L	15196142	22	G	C
2L	15209706	24	C	T
2L	15269997	17	G	A
2L	15286702	37	G	C
2L	15375155	5	C	G
2L	15384157	4	T	A
2L	15396550	27	T	A
2L	15408786	19	G	A
2L	15419889	20	T	C
2L	15428389	35	C	A
2L	15534352	37	T	A
2L	15571382	19	G	A
2L	15799799	34	C	T
2L	15808474	38	G	A
2L	15859055	38	G	A
2L	15949756	37	A	T
2L	15958768	37	C	G
2L	15961164	28	G	T
2L	15994577	37	C	A
2L	16093191, 16093193	23	T, A	A, C
2L	16282665	25	G	C
2L	16303915	6	A	G
2L	16408586	19	A	G
2L	16461045	35	G	A
2L	16478647	15	A	G
2L	16580045	16	G	C
2L	16582307	28	G	A
2L	16660388	26	G	A
2L	16675280	5	C	T
2L	16799814	22	C	T
2L	16816980	19	G	T
2L	16897553	22	G	A
2L	16922244	31	G	T
2L	17027154	23	C	A
2L	17072942	7	T	A
2L	17127231	19	A	G
2L	17183332	19	T	A
2L	17183631	25	G	A
2L	17217951	34	G	T
2L	17302339	18	G	T
2L	17405774	38	C	T
2L	17466346	4	G	A
2L	17594791	24	G	A
2L	17604871	35	C	A
2L	17724048	17	A	C
2L	17731735	14	G	C
2L	17805476, 17805478	3	A, C	C, A
2L	17926302	6	A	T
2L	17930889	35	T	C
2L	18069609	5	A	T
2L	18166277	29	G	A
2L	18252244	34	G	T
2L	18275599	28	C	G
2L	18305692	24	G	A
2L	18351608	13	T	A
2L	18390094	24	A	G
2L	18438750	10	C	T
2L	18474365	19	A	G
2L	18647855	14	A	G
2L	18698002	16	G	A
2L	18739403	33	G	A
2L	18744779	3	G	A
2L	18808283	15	G	T
2L	18879913	37	C	T
2L	18946150	3	T	A
2L	18956096	36	C	T
2L	18981028	34	C	T
2L	19023355	21	G	C
2L	19038882	25	T	C
2L	19039143	26	G	A
2L	19044493	22	T	A
2L	19074260	38	C	T
2L	19091126	9	C	T
2L	19093185	17	A	C
2L	19131641	13	C	A
2L	19185029	6	C	A
2L	19384730	32	C	T
2L	19485351	19	G	A
2L	19488321	18	G	A
2L	19590129	5	A	G
2L	19696423	5	C	A
2L	19717747	30	G	C
2L	19731120	19	C	T
2L	19858002	38	C	T
2L	19872877	38	A	T
2L	20046556	20	C	T
2L	20128352	10	T	G
2L	20144120	24	G	A
2L	20165625	6	G	A
2L	20236000	23	G	C
2L	20351115	23	T	A
2L	20406580	28	A	T
2L	20537908	31	C	G
2L	20612688	16	A	T
2L	20766413	38	G	C
2L	20822985	12	C	A
2L	20837619	37	C	T
2L	20860792	6	G	A
2L	20869260	9	T	G
2L	20874138	17	T	A
2L	20993194	28	G	A
2L	21171276	11	C	T
2L	21225477	28	G	A
2L	21265142	31	G	T
2L	21334759	35	A	G
2L	21658011	18	T	G
2L	21703172, 21703173	29	G, A	T, T
2L	21743966	31	A	G
2L	21884764	8	G	C
2L	21965626	3	A	T
2L	21974522	7	C	T
2L	22117823	21	T	A
2L	22129152	23	A	T
2L	22229530	19	T	G
2L	22298735	8	G	C
2L	22319703	38	C	T
2L	22587781	3	T	G
2L	22610109	12	T	G
2L	22625427	35	C	A
2L	22868286	17	C	G
2L	22895554	26	T	C
2L	22899243	12	T	G
2L	22921135	5	A	G
2R	76886	37	G	A
2R	82689	33	G	A
2R	173838	9	C	G
2R	174466	32	T	A
2R	199936	3	G	A
2R	277582	38	G	C
2R	409807	5	C	A
2R	431976	28	A	T
2R	452775	38	G	C
2R	515055	2	C	G
2R	602013	9	T	G
2R	617875	37	G	A
2R	763674	28	G	A
2R	764532	12	A	G
2R	782476	35	A	G
2R	793271	9	A	T
2R	864474	23	T	C
2R	900217	7	C	T
2R	963262	15	T	G
2R	1023320	15	G	A
2R	1088579	9	A	G
2R	1166208	32	G	A
2R	1224921	5	C	T
2R	1291874	23	G	T
2R	1407321	38	G	A
2R	1442198	24	T	A
2R	1543323	10	T	C
2R	1545418	33	G	A
2R	1788388	27	T	G
2R	1788413	1	G	A
2R	1852750	2	G	A
2R	1881690	38	G	A
2R	1899839	35	G	T
2R	1943428	21	C	G
2R	2008148	20	A	G
2R	2034057	9	T	A
2R	2059217	33	G	A
2R	2107933	1	G	A
2R	2123551	18	C	T
2R	2181197	1	C	T
2R	2401991	23	T	C
2R	2412282	4	C	T
2R	2457976	19	C	A
2R	2460489	14	C	T
2R	2497813	14	T	A
2R	2509668, 2509673	38	G, C	T, T
2R	2511567	23	G	T
2R	2624051	3	A	C
2R	2684795	2	G	A
2R	2698689	34	C	T
2R	2781573	34	G	A
2R	3012893	18	C	T
2R	3046870	15	C	G
2R	3052303	14	C	T
2R	3089318	34	A	G
2R	3121952	20	C	A
2R	3179993	36	A	C
2R	3180164	32	G	A
2R	3207527	22	T	A
2R	3263713, 3263714	7	G, G	A, A
2R	3333146	30	C	A
2R	3334924	38	A	G
2R	3446024	11	G	A
2R	3451588	5	A	G
2R	3460531	14	A	R
2R	3482968	35	C	G
2R	3556678	4	A	T
2R	3558149	7	G	A
2R	3565335	38	G	A
2R	3615007	3	G	T
2R	3629097	9	C	T
2R	3661379	36	G	A
2R	3748364	17	C	T
2R	3766001	30	C	T
2R	3782583	38	A	C
2R	3802184	1	G	A
2R	3853664	5	T	A
2R	3920515	19	G	T
2R	3973817	2	C	A
2R	3976272	29	T	A
2R	4012550	13	A	G
2R	4057067	32	C	T
2R	4102799	20	C	T
2R	4278461	38	G	A
2R	4290982	6	G	A
2R	4401817	5	G	A
2R	4480815	34	T	A
2R	4551597	19	C	A
2R	4587665	27	G	C
2R	4600223	38	C	T
2R	4607521	37	G	A
2R	4607636	21	G	A
2R	4621331	32	G	A
2R	4632327	1	C	G
2R	4672622	25	G	A
2R	4937172	37	A	T
2R	5009892	38	A	C
2R	5022055	8	G	C
2R	5130184	37	C	A
2R	5159432	3	A	T
2R	5161861	24	C	T
2R	5184220	18	A	C
2R	5199261	26	A	C
2R	5266684	11	C	T
2R	5278688	20	G	T
2R	5381153	24	T	C
2R	5411880	2	T	C
2R	5422878	2	G	A
2R	5468466	24	G	A
2R	5543071	7	C	T
2R	5767843	13	G	A
2R	5793169	38	C	T
2R	5842815	37	A	G
2R	5848455	31	C	T
2R	5885097	18	G	A
2R	5901587	26	G	C
2R	5924814	3	G	C
2R	5941124	24	T	C
2R	5950310	10	G	A
2R	6038457	29	C	A
2R	6049910	16	C	A
2R	6329085	30	G	A
2R	6421180	33	C	G
2R	6485428	20	C	T
2R	6567814	19	C	T
2R	6585279	19	C	G
2R	6625284	37	C	G
2R	6628176	1	A	G
2R	6709117	23	A	G
2R	6769916	37	G	A
2R	6773802	18	A	G
2R	6776365	32	G	A
2R	6809371	28	G	A
2R	6810564	37	C	A
2R	6829902	15	C	T
2R	6873134	19	G	T
2R	6888267	1	G	T
2R	6995144	20	A	G
2R	7066996	37	C	T
2R	7171588	16	C	T
2R	7179908	37	G	T
2R	7207910	27	C	T
2R	7212702	35	A	G
2R	7216384	21	C	A
2R	7263527	27	A	T
2R	7269223	12	G	T
2R	7270145	33	C	T
2R	7336263	15	G	C
2R	7369723	24	A	G
2R	7415659	8	T	A
2R	7560366	26	T	A
2R	7713915	24	T	C
2R	7724304	30	G	A
2R	7830072	38	A	G
2R	7830254	18	T	C
2R	7908920	9	C	T
2R	7976672	5	C	T
2R	8347522	37	G	A
2R	8347940	18	A	C
2R	8465466	13	C	T
2R	8477418	5	A	G
2R	8480166	37	C	G
2R	8509718	7	C	A
2R	8573418	38	T	C
2R	8583082	1	C	A
2R	8606555	38	C	G
2R	8643378	9	T	G
2R	8661029	34	C	A
2R	8716435	17	C	T
2R	8789620	7	C	T
2R	8823769	37	C	G
2R	8849050	38	C	T
2R	9048734	3	T	G
2R	9092176, 9092177	8	C, C	T, T
2R	9186179	37	C	T
2R	9247070	28	A	G
2R	9272637, 9272638	28	G, C	A, A
2R	9293332	4	A	T
2R	9317564	38	C	T
2R	9477549	26	C	A
2R	9483726	6	T	G
2R	9642996	17	G	A
2R	9662548	38	T	A
2R	9714773	12	C	T
2R	9748454	36	C	A
2R	9755843	14	T	G
2R	9826318	4	C	A
2R	9842340	2	G	A
2R	9880216	26	A	G
2R	9900901	32	A	C
2R	9942766	35	T	A
2R	10023014	1	C	T
2R	10045027	10	G	A
2R	10048341	23	G	A
2R	10168979	37	T	A
2R	10174453	21	A	C
2R	10271514	20	G	A
2R	10324465	37	T	A
2R	10352525	18	T	A
2R	10364947	38	C	T
2R	10390815	35	C	T
2R	10433796	28	C	T
2R	10551585	38	G	A
2R	10638317	13	G	C
2R	10693106	18	C	A
2R	10729677	28	G	T
2R	10747190	8	G	A
2R	10971474	3	C	A
2R	11189390	25	G	C
2R	11190398	17	T	C
2R	11223220	35	G	A
2R	11264255	23	G	C
2R	11268406	37	A	G
2R	11275161	17	G	A
2R	11309509	2	C	T
2R	11342754	9	T	C
2R	11368280	7	G	T
2R	11569433	25	G	A
2R	11627362	28	G	A
2R	11635344	9	C	T
2R	11657235	24	C	T
2R	11705898	37	A	G
2R	11780468	17	T	C
2R	11966007	21	A	T
2R	12048289	34	C	T
2R	12108278	29	A	T
2R	12126853	32	T	C
2R	12176322	24	C	G
2R	12200151, 12200152	33	G, T	A, A
2R	12277276	12	T	C
2R	12306512	3	A	G
2R	12479120	28	C	T
2R	12504828	7	A	C
2R	12591425	19	T	A
2R	12591642, 12591643	32	A, A	T, T
2R	12636333	15	C	T
2R	12638731	34	G	A
2R	12671447	20	C	T
2R	12745185	21	T	A
2R	12753471	16	A	G
2R	12787623	18	G	A
2R	12797983	3	G	A
2R	12863239	31	T	C
2R	12873912	24	T	A
2R	12898103	29	G	A
2R	13000914	38	G	A
2R	13255856	13	G	A
2R	13271715	30	C	T
2R	13300638	3	T	A
2R	13302854	3	C	T
2R	13305859	18	T	C
2R	13339118	20	T	A
2R	13371352	30	C	G
2R	13386971	26	T	A
2R	13566047	37	A	G
2R	13589413	1	C	T
2R	13616420	34	G	A
2R	13655725	17	C	T
2R	13659277	6	G	A
2R	13713789	7	A	T
2R	13774375	9	C	T
2R	13813412	6	T	C
2R	13843046	4	A	T
2R	13917974	23	G	A
2R	14075882	7	T	A
2R	14118966	1	A	T
2R	14263122	37	T	A
2R	14304084	1	G	A
2R	14307034	3	G	A
2R	14330630	33	C	T
2R	14336006	21	G	A
2R	14507463	38	T	C
2R	14566724	4	G	A
2R	14567140	27	G	A
2R	14572081	15	G	T
2R	14594710	38	C	T
2R	14628904	35	T	C
2R	14682734	15	G	C
2R	14712398	30	C	T
2R	14716559	2	C	G
2R	14748019	26	T	C
2R	14793611	18	G	A
2R	14927259	8	T	G
2R	14945097	37	C	T
2R	15012474	37	G	C
2R	15085242	37	C	A
2R	15271304	26	C	A
2R	15304263	2	A	T
2R	15532556	10	A	C
2R	15960398	17	T	G
2R	16004736	9	C	T
2R	16015243	37	G	A
2R	16244471	29	C	G
2R	16246382	31	C	T
2R	16317893	16	A	T
2R	16366117	4	C	T
2R	16502651	37	A	G
2R	16502932	20	G	A
2R	16515240	35	C	T
2R	16858882	27	G	A
2R	16888120	2	C	G
2R	16952030	18	C	T
2R	17033256	24	A	G
2R	17048817	34	A	G
2R	17052488	25	G	A
2R	17077271	37	C	G
2R	17196621	22	A	T
2R	17313059	38	A	C
2R	17386616	2	G	A
2R	17516197	13	C	A
2R	17563439, 17563446	1	A, A	T, C
2R	17635831	11	A	T
2R	17745865	34	G	A
2R	17839691	12	C	A
2R	17973635	10	C	A
2R	18069958	22	A	G
2R	18087458	7	C	T
2R	18093699	33	C	G
2R	18142905	31	A	C
2R	18196247	37	A	C
2R	18429343	38	A	T
2R	18477944	11	C	A
2R	18520399	12	G	A
2R	18525246	35	A	T
2R	18534113	6	T	A
2R	18535277	25	G	T
2R	18535658	21	G	A
2R	18538349	33	T	A
2R	18546441	4	G	A
2R	18565833	36	G	A
2R	18571581	6	C	T
2R	18586117	13	T	A
2R	18593140	38	A	G
2R	18598364	30	C	T
2R	18655331	3	C	T
2R	18673046	33	A	T
2R	18761376	35	G	A
2R	18775507	37	C	T
2R	18779289	20	A	G
2R	18807081	9	G	A
2R	18818983	22	G	A
2R	18824208	17	A	G
2R	18872314	7	T	C
2R	18908773	26	C	T
2R	18977539	8	A	T
2R	19019225	17	T	C
2R	19044071	6	C	T
2R	19133274	1	G	A
2R	19161179	32	T	G
2R	19187325	35	A	G
2R	19224476	17	C	T
2R	19255351	18	G	A
2R	19347326	32	G	T
2R	19407160	27	C	T
2R	19456892	22	G	A
2R	19519196	7	C	T
2R	19524964	25	C	T
2R	19526552	37	G	C
2R	19672176	18	G	A
2R	19747986	20	G	A
2R	19759274	21	G	T
2R	19782174	23	G	A
2R	19786771	29	C	T
2R	19835013	25	T	A
2R	19884291	17	G	A
2R	19932630	23	C	A
2R	19935369	16	T	C
2R	20002703	18	A	C
2R	20276674	35	G	A
2R	20438254, 20438255	15	G, G	C, C
2R	20497050	33	C	T
2R	20500961	28	A	T
2R	20507593	27	G	A
2R	20548639	2	G	T
2R	20678600	19	G	T
2R	20758583	17	A	T
2R	20787605, 20787606	21	G, G	A, A
2R	20867318	34	G	T
2R	20901422	32	T	A
2R	20953392	1	G	T
2R	21017095	22	T	A
2R	21021854	31	T	C
2R	21071550	5	C	T
2R	21104757	28	A	G
2R	21111964	38	C	T

## Sheet: Indels
Chromosome_arm	Location	Sample	Ancestral_sequence	Derived_sequence
2L	243965	4	AG	A
2L	1838841	22	GT	G
2L	2009757	32	GT	G
2L	2669776	5	GC	G
2L	3706789	35	TAC	T
2L	3973971	33	T	TAC
2L	4319309	35	CT	C
2L	4761487	38	TA	T
2L	5255089	30	T	TATAC
2L	5791862	32	CA	C
2L	6662686	14	GT	G
2L	7352369	17	CACTT	C
2L	7418953	38	AT	A
2L	11135547	19	TA	T
2L	11412235	20	G	TT
2L	12292342	3	TAAAG	T
2L	15177368	22	TTCGCT	TA
2L	15971890	37	CT	C
2L	16547478	3	GT	G
2L	18080530	33	A	AGTAT
2L	18658308	38	TTTTA	T
2L	19000973	30	A	ATATG
2L	21275609	35	ACCC	AT
2L	21903085	37	CAGGG	C
2L	21914449	24	GT	G
2L	22022443	17	T	TG
2R	2819222	18	TG	T
2R	3581631	32	T	TTC
2R	4395589	32	GT	G
2R	4794416	26	A	AT
2R	5522336	9	TA	T
2R	6848823	22	A	ATA
2R	7000702	18	G	GA
2R	12012150	28	CA	C
2R	12487461	24	TG	T
2R	12720959	22	TC	T
2R	12956920	37	GGA	G
2R	13100110	5	GG	T
2R	14434735	26	AT	A
2R	14522359	35	CTTCG	CAT
2R	14716286	30	A	AATAC
2R	15369362	28	TGCGTA	CGCG
2R	16211055	35	GGC	G
2R	17936624	7	GAAAA	AAAAAAT
2R	18718473	32	CT	C
2R	18777967	30	CT	C
2R	19058232	35	CTCAT	C
2R	19134342	32	ACGT	A
2R	19687928	26	AG	A

## Sheet: Gene conversion
Chromosome_arm	Location_range	Sample		Consensus_base	Conversion_result	Observed	Expected
2L	612623..615493	37		A:T	C:G	43	35.9218
2L	1869662..1874979	10		A:T	G:C	83	87.5475
2L	2432719..2433595	9		A:T	T:A	43	45.5307
2L	2831383..2831650	19		C:G	A:T	41	39.4762
2L	3656512..3656930	10		C:G	G:C	36	31.6004
2L	4765760..4768643	10		C:G	T:A	93	98.9234
2L	5041983..5043620	25
2L	6558001..6561791	19
2L	8865687..8865767	9
2L	10432921..10437184	37
2L	10542916..10542978	9
2L	13072899..13072910	9
2L	14966709..14968027	30
2L	16754208..16754593	19
2L	21104891..21105048	30
2L	21732131..21732166	9
2L	21875209..21877327	38
2R	4435523..4435955	10
2R	10736660..10737467	16
2R	10736555..10737804	2
2R	10809309..10810886	35
2R	11328034..11328433	1
2R	11880649..11880936	3
2R	14721307..14724847	37
2R	15692754..15694099	10
2R	16883657..16885039	9
2R	17473029..17474364	20
2R	18179023..18179843	7
2R	18977900..18979229	28
2R	19622724..19624373	10
2R	19753213..19753698	18
2R	19975175..19975639	22
2R	20154684..20154767	23
2R	20216161..20216358	27
2R	20257923..20260408	28
2R	20324563..20325137	28

## Sheet: Transposable elements
Chromosome_arm	Approximate_location_range	Sample	Family
2L	66802..67100	18	P-element
2L	68730..69017	33	mdg3
2L	107822..108155	37	P-element
2L	436581..436680	38	copia
2L	552460..552762	19	P-element
2L	743074..743424	35	roo
2L	1158612..1158871	22	P-element
2L	1554947..1555198	20	P-element
2L	1642583..1642682	38	mdg3
2L	1703695..1703794	33	copia
2L	1961445..1961544	24	copia
2L	2178470..2178679	15	P-element
2L	2180882..2181212	29	copia
2L	2720091..2720460	4	Rt1a
2L	2750915..2751229	38	P-element
2L	2754908..2754992	17	P-element
2L	2999132..2999407	22	P-element
2L	3105550..3105906	30	copia
2L	3655807..3656105	25	P-element
2L	3825396..3825666	21	P-element
2L	3836746..3837040	35	P-element
2L	4821926..4822137	19	Rt1a
2L	5091351..5091450	33	mdg3
2L	5093177..5093411	11	Rt1a
2L	5521865..5521963	30	mdg3
2L	5658492..5658565	18	P-element
2L	5983343..5983678	38	P-element
2L	6153033..6153233	30	Rt1a
2L	6252935..6253236	24	P-element
2L	6473246..6473324	20	copia
2L	6917895..6917994	30	copia
2L	6931913..6932233	5	micropia
2L	7392984..7393283	32	Rt1a
2L	7423471..7423769	9	P-element
2L	7800029..7800338	34	P-element
2L	7809726..7810015	22	P-element
2L	7855267..7855559	26	P-element
2L	7984076..7984377	25	P-element
2L	7991566..7991845	18	P-element
2L	8009404..8009706	29	P-element
2L	8147857..8148181	31	copia
2L	8257392..8257673	35	P-element
2L	8361782..8362077	13	P-element
2L	8362296..8362613	10	P-element
2L	8475548..8475858	37	copia
2L	8524651..8524979	18	Quasimodo
2L	8859998..8860097	30	pogo
2L	9421346..9421679	31	mdg3
2L	9616698..9616989	38	P-element
2L	9731461..9731719	18	Rt1a
2L	9812726..9813088	38	Rt1a
2L	9871444..9871720	22	copia
2L	9886605..9886667	28	pogo
2L	9906068..9906167	28	copia
2L	9984444..9984730	23	P-element
2L	10303724..10304015	18	P-element
2L	10357717..10358007	30	pogo
2L	10516446..10516764	6	P-element
2L	10572599..10572698	4	pogo
2L	10626963..10627359	37	micropia
2L	10903914..10904158	20	Quasimodo
2L	11249609..11249866	23	Rt1a
2L	12027518..12027855	31	P-element
2L	12584975..12585074	37	mdg3
2L	12585086..12585185	37	copia
2L	12603156..12603255	37	roo
2L	12678408..12678716	21	P-element
2L	12725726..12725783	30	invader2
2L	12822654..12822944	26	P-element
2L	14000721..14001086	38	Rt1a
2L	14061133..14061227	8	copia
2L	14063194..14063446	34	Rt1a
2L	14232884..14233214	13	Quasimodo
2L	14278819..14278918	37	pogo
2L	15745449..15745699	31	P-element
2L	15762614..15762890	25	P-element
2L	16279959..16280250	22	P-element
2L	16550891..16551134	20	Quasimodo
2L	16614566..16614665	38	roo
2L	16636272..16636371	27	Quasimodo
2L	17206664..17206982	18	mdg3
2L	18112654..18112941	4	copia
2L	18126780..18126877	24	copia
2L	18213097..18213398	27	Rt1a
2L	18714933..18715002	18	roo
2L	18823393..18823679	25	P-element
2L	18968563..18968662	9	P-element
2L	18969099..18969184	17	P-element
2L	19119481..19119565	30	pogo
2L	19432865..19433197	4	P-element
2L	19576549..19576846	26	P-element
2L	19587305..19587600	35	Rt1a
2L	19990099..19990198	37	roo
2L	20632432..20632739	24	copia
2L	20715900..20716188	10	P-element
2L	20822469..20822775	27	Quasimodo
2L	20867939..20868022	30	pogo
2L	21051430..21051736	13	Quasimodo
2L	21116682..21116991	35	roo
2L	21341143..21341443	7	micropia
2L	21681986..21682311	37	P-element
2L	21830868..21831225	9	pogo
2L	22959723..22959822	37	Stalker4
2R	198666..198765	38	I-element
2R	1437768..1437867	24	Cr1a
2R	1589418..1589794	14	P-element
2R	1916485..1916584	30	mdg3
2R	1935461..1935774	24	copia
2R	2004743..2005049	33	pogo
2R	2104192..2104500	37	micropia
2R	2389228..2389549	38	P-element
2R	2498425..2498732	35	P-element
2R	2758971..2759241	33	P-element
2R	3524410..3524509	31	copia
2R	3620360..3620459	31	copia
2R	3694291..3694647	5	Rt1a
2R	3781207..3781253	27	copia
2R	3800500..3800599	37	pogo
2R	4230767..4230860	25	mdg3
2R	4447523..4447904	13	Quasimodo
2R	4460876..4461153	19	mdg3
2R	4975454..4975553	17	pogo
2R	5073715..5073990	27	P-element
2R	5142220..5142495	30	roo
2R	5157814..5158197	5	P-element
2R	5378660..5378759	37	copia
2R	5427969..5428254	22	P-element
2R	5441501..5441772	29	P-element
2R	5454647..5454902	30	pogo
2R	5464794..5465073	27	P-element
2R	5514136..5514523	38	Rt1a
2R	5563934..5564340	37	pogo
2R	5759096..5759147	38	rooA
2R	5913016..5913252	33	P-element
2R	5957543..5957642	33	mdg3
2R	6110521..6110587	18	297
2R	6124455..6124784	18	copia
2R	6421386..6421688	9	P-element
2R	6613012..6613109	24	mdg3
2R	6613235..6613334	24	copia
2R	6622255..6622310	31	copia
2R	6723570..6723625	22	copia
2R	6927767..6928068	33	Rt1a
2R	6949576..6949902	2	roo
2R	7254640..7254899	6	P-element
2R	7298848..7298947	38	invader2
2R	7418058..7418371	37	roo
2R	7532323..7532567	10	Rt1a
2R	7725842..7725934	37	copia
2R	7858065..7858135	33	P-element
2R	8024116..8024215	38	copia
2R	8340827..8341115	20	P-element
2R	8341841..8341940	1	P-element
2R	8416832..8417186	5	P-element
2R	8633303..8633372	30	invader2
2R	8633380..8633652	30	pogo
2R	8791335..8791624	20	Rt1a
2R	9393868..9394172	28	pogo
2R	9427891..9428130	30	copia
2R	9431433..9431532	37	P-element
2R	9433184..9433283	37	P-element
2R	9510187..9510500	20	P-element
2R	9888485..9888536	12	P-element
2R	10093857..10094283	6	Quasimodo
2R	10448251..10448350	38	copia
2R	10448363..10448462	38	mdg3
2R	10463182..10463507	34	P-element
2R	10506321..10506420	6	P-element
2R	10523348..10523637	20	roo
2R	10580693..10580950	25	Rt1a
2R	10652800..10653019	15	P-element
2R	10992649..10993001	14	Rt1a
2R	11048895..11049216	38	Quasimodo
2R	11501195..11501483	7	P-element
2R	11579423..11579522	37	pogo
2R	11617714..11618054	15	Rt1a
2R	11664849..11665108	30	copia
2R	11802591..11802690	38	copia
2R	12133379..12133741	1	copia
2R	12915788..12916077	35	P-element
2R	13156932..13157025	2	copia
2R	13367461..13367775	18	copia
2R	13468860..13469177	33	P-element
2R	13567856..13568165	20	copia
2R	13906073..13906092	35	copia
2R	14059023..14059327	7	P-element
2R	14405184..14405550	15	mdg3
2R	14740385..14740484	5	P-element
2R	15245203..15245295	1	P-element
2R	15310212..15310574	35	copia
2R	15310962..15311243	10	P-element
2R	15519473..15519823	5	P-element
2R	15696564..15696892	24	copia
2R	16151390..16151710	30	pogo
2R	16299248..16299346	23	Rt1a
2R	16475884..16475978	11	P-element
2R	16501687..16501991	10	pogo
2R	16594615..16594883	14	Rt1a
2R	16659146..16659473	6	Rt1a
2R	16723291..16723592	38	P-element
2R	16899295..16899612	4	P-element
2R	17046997..17047296	30	mdg3
2R	17047425..17047765	18	Quasimodo
2R	17066391..17066698	29	P-element
2R	17132200..17132528	9	roo
2R	17286085..17286473	21	copia
2R	17316386..17316485	12	Rt1a
2R	17374586..17374685	6	Quasimodo
2R	17402305..17402404	10	pogo
2R	17551183..17551255	33	invader2
2R	17600676..17600966	2	P-element
2R	17849051..17849150	38	Quasimodo
2R	17868337..17868436	29	roo
2R	17919114..17919415	23	Rt1a
2R	18401801..18402077	31	P-element
2R	18403321..18403420	34	copia
2R	18662070..18662162	24	copia
2R	18662289..18662352	24	Cr1a
2R	19153956..19154036	25	copia
2R	19214999..19215339	37	P-element
2R	19460089..19460188	32	pogo
2R	19527469..19527541	30	copia
2R	19836144..19836429	31	P-element
2R	20449011..20449336	36	P-element
2R	20830025..20830378	5	P-element
2R	20980234..20980319	31	copia
